# Supplementary material for: Eight potential biomarkers for distinguishing between lung adenocarcinoma and squamous cell carcinoma
Source: PubMed Central journal article supplement (PMC5641087; doi:10.18632/oncotarget.17606), 2017-05-03
Supplement: oncotarget-08-71759-s001.pdf [file oncotarget-08-71759-s001.pdf]

## **Eight potential biomarkers for distinguishing between lung adenocarcinoma and squamous cell carcinoma**

### **SUPPLEMENTARY TABLES**

**Supplementary Table 1: Potentially differentially expressed genes between lung adenocarcinoma and squamous cell carcinoma in dataset GSE28571.**

See Supplementary File 1

**Supplementary Table 2: Potentially differentially expressed genes between lung adenocarcinoma and squamous cell carcinoma in dataset GSE37745.**

See Supplementary File 2

**Supplementary Table 3: Potentially differentially expressed genes between lung adenocarcinoma and squamous cell carcinoma in dataset GSE43580.**

See Supplementary File 3

**Supplementary Table 4: Potentially differentially expressed genes between lung adenocarcinoma and squamous cell carcinoma in dataset GSE50081.**

See Supplementary File 4

**Supplementary Table 5: Differentially expressed genes (that removed the expressions without specific gene symbol and the reduplicative expressions under a same gene symbol) between lung adenocarcinoma and squamous cell carcinoma in dataset GSE28571.**

See Supplementary File 5

**Supplementary Table 6: Differentially expressed genes (that removed the expressions without specific gene symbol and the reduplicative expressions under a same gene symbol) between lung adenocarcinoma and squamous cell carcinoma in dataset GSE37745.**

See Supplementary File 6

**Supplementary Table 7: Differentially expressed genes (that removed the expressions without specific gene symbol and the reduplicative expressions under a same gene symbol) between lung adenocarcinoma and squamous cell carcinoma in dataset GSE43580.**

See Supplementary File 7

**Supplementary Table 8: Differentially expressed genes (that removed the expressions without specific gene symbol and the reduplicative expressions under a same gene symbol) between lung adenocarcinoma and squamous cell carcinoma in dataset GSE50081.**

See Supplementary File 8

**Supplementary Table 9: Potentially differentially expressed genes between lung adenocarcinoma and squamous cell carcinoma merged by four datasets (GSE28571, GSE37745, GSE43580 and GSE50081).**

See Supplementary File 9

**Supplementary Table 10: Differentially expressed genes (that removed the expressions without specific gene symbol and the reduplicative expressions under a same gene symbol) between lung adenocarcinoma and squamous cell carcinoma merged by four datasets (GSE28571, GSE37745, GSE43580 and GSE50081).**

See Supplementary File 10

**Supplementary Table 11: Main characteristics of adenocarcinoma and squamous cell carcinoma samples in lung cancer dataset GSE28571 (For more details, please visit the website of <https://www.gcbi.com.cn/gclib/html/sample/R1NFMjg1NzE/1/20>).**

See Supplementary File 11

**Supplementary Table 12: Main characteristics of adenocarcinoma and squamous cell carcinoma samples in lung cancer dataset GSE37745 (For more details, please visit the website of <https://www.gcbi.com.cn/gclib/html/sample/R1NFMzc3NDU/1/20>).**

See Supplementary File 12

**Supplementary Table 13: Main characteristics of adenocarcinoma and squamous cell carcinoma samples in lung cancer dataset GSE43580 (For more details, please visit the website of <https://www.gcbi.com.cn/gclib/html/sample/R1NFNDM1ODA/1/20>).**

See Supplementary File 13

**Supplementary Table 14: Main characteristics of adenocarcinoma and squamous cell carcinoma samples in lung cancer dataset GSE50081 (For more details, please visit the website of <https://www.ncbi.nlm.nih.gov/geo/query/acc.cgi?acc=GSE50081>).**

See Supplementary File 14
